# Supplementary material
Source: Springer Nature journal article supplement (https://www.springermedizin.de/resource/supplementary/13063_2010_470_MOESM1_ESM.pdf/9618286)
Supplement: MOESM1 [file 9618286]

1735 PubMed citations

856 excluded:

- 438 observational studies
- 154 reviews
- 80 editorial/letters
- 61 non-randomised trials studies
- 31 secondary publications
- 25 diagnostic test studies
- 21 methodology studies
- 14 economic evaluation studies
- 10 non-trial experiments
- 9 study protocols
- 6 qualitative studies
- 3 non-human studies
- 2 guidelines
- 2 case reports

879 full articles reviewed

263 excluded:

- 100 secondary publications
- 46 non-randomised trials studies
- 44 observational studies
- 33 non-trial experiments
- 10 editorial/letters
- 7 reviews
- 6 interim analysis reports
- 4 diagnostic test studies
- 3 economic evaluation studies
- 3 study protocols/study plan
- 2 methodology studies
- 2 case reports
- 1 qualitative study
- 1 non-human study
- 1 non English language

616 randomised trials
